# Supplementary material
Source: MDPI journal article supplement (https://www.mdpi.com/2311-7524/9/5/522)
Supplement: s1 [file s1]

Archive with 2 entries (2 files):
- Supplemental Figures.pdf
- Supplemental Table S1.xls
