# Supplementary material
Source: MDPI journal article supplement (https://www.mdpi.com/2311-7524/9/5/522)
Supplement: s1 [file s1 › Supplemental Table S1.xls]

Family ID	Numbers	Motif_name	Motif_seq
PbrLhca1.1	8	motif1;motif2;motif5;motif6;motif7;motif8;motif13;motif15	FPGDYGFDPLGLSADPETFAKNRELEVIHSRWAM;ELKVKEJKNGRLAMFSMLGFFVQAIVTGK;JENLADHLADPVHNN;SJTTLLVIEFLLIGYVEFQRWADLDPPKS;FDPLGLAKDPE;LGALGCIFPELLSRN;AMRGEWLPGLPSPPYLDGS;MATSAASSSAASLAI
PbrLhca1.2	8	motif1;motif2;motif5;motif6;motif7;motif8;motif13;motif15	FPGDYGFDPLGLSADPETFAKNRELEVIHSRWAM;ELKVKEJKNGRLAMFSMLGFFVQAIVTGK;JENLADHLADPVHNN;SJTTLLVIEFLLIGYVEFQRWADLDPPKS;FDPLGLAKDPE;LGALGCIFPELLSRN;AMRGEWLPGLPSPPYLDGS;MATSAASSSAASLAI
PbrLhca2	7	motif1;motif2;motif5;motif6;motif8;motif13;motif15	FPGDYGFDPLGLSADPETFAKNRELEVIHSRWAM;ELKVKEJKNGRLAMFSMLGFFVQAIVTGK;JENLADHLADPVHNN;SJTTLLVIEFLLIGYVEFQRWADLDPPKS;LGALGCIFPELLSRN;AMRGEWLPGLPSPPYLDGS;MATSAASSSAASLAI
PbrLhca3	7	motif1;motif2;motif5;motif6;motif8;motif13;motif15	FPGDYGFDPLGLSADPETFAKNRELEVIHSRWAM;ELKVKEJKNGRLAMFSMLGFFVQAIVTGK;JENLADHLADPVHNN;SJTTLLVIEFLLIGYVEFQRWADLDPPKS;LGALGCIFPELLSRN;AMRGEWLPGLPSPPYLDGS;MATSAASSSAASLAI
PbrLhca4	7	motif1;motif2;motif5;motif6;motif8;motif13;motif15	FPGDYGFDPLGLSADPETFAKNRELEVIHSRWAM;ELKVKEJKNGRLAMFSMLGFFVQAIVTGK;JENLADHLADPVHNN;SJTTLLVIEFLLIGYVEFQRWADLDPPKS;LGALGCIFPELLSRN;AMRGEWLPGLPSPPYLDGS;MATSAASSSAASLAI
PbrLhca5	7	motif1;motif2;motif5;motif6;motif7;motif8;motif13	FPGDYGFDPLGLSADPETFAKNRELEVIHSRWAM;ELKVKEJKNGRLAMFSMLGFFVQAIVTGK;JENLADHLADPVHNN;SJTTLLVIEFLLIGYVEFQRWADLDPPKS;FDPLGLAKDPE;LGALGCIFPELLSRN;AMRGEWLPGLPSPPYLDGS
PbrLhca6	7	motif1;motif2;motif5;motif6;motif8;motif13;motif15	FPGDYGFDPLGLSADPETFAKNRELEVIHSRWAM;ELKVKEJKNGRLAMFSMLGFFVQAIVTGK;JENLADHLADPVHNN;SJTTLLVIEFLLIGYVEFQRWADLDPPKS;LGALGCIFPELLSRN;AMRGEWLPGLPSPPYLDGS;MATSAASSSAASLAI
PbrLhcb1.1	11	motif1;motif2;motif3;motif4;motif5;motif7;motif8;motif10;motif11;motif12;motif15	FPGDYGFDPLGLSADPETFAKNRELEVIHSRWAM;ELKVKEJKNGRLAMFSMLGFFVQAIVTGK;EAVWFKAGAQIFSEGGLDYLGNPSLVHAQSILAIWATQVVLMGAVEGYRI;KVSSGSPWYGPDRVKYLGPFSGZTPSYLTGE;JENLADHLADPVHNN;FDPLGLAKDPE;LGALGCIFPELLSRN;AWAYATNFVPG;GGPLGEITDPLYPGG;VNLSPEFSALLGNGRVSMRKT;MATSAASSSAASLAI
PbrLhcb1.2	11	motif1;motif2;motif3;motif4;motif5;motif7;motif8;motif10;motif11;motif12;motif15	FPGDYGFDPLGLSADPETFAKNRELEVIHSRWAM;ELKVKEJKNGRLAMFSMLGFFVQAIVTGK;EAVWFKAGAQIFSEGGLDYLGNPSLVHAQSILAIWATQVVLMGAVEGYRI;KVSSGSPWYGPDRVKYLGPFSGZTPSYLTGE;JENLADHLADPVHNN;FDPLGLAKDPE;LGALGCIFPELLSRN;AWAYATNFVPG;GGPLGEITDPLYPGG;VNLSPEFSALLGNGRVSMRKT;MATSAASSSAASLAI
PbrLhcb1.3	11	motif1;motif2;motif3;motif4;motif5;motif7;motif8;motif10;motif11;motif12;motif15	FPGDYGFDPLGLSADPETFAKNRELEVIHSRWAM;ELKVKEJKNGRLAMFSMLGFFVQAIVTGK;EAVWFKAGAQIFSEGGLDYLGNPSLVHAQSILAIWATQVVLMGAVEGYRI;KVSSGSPWYGPDRVKYLGPFSGZTPSYLTGE;JENLADHLADPVHNN;FDPLGLAKDPE;LGALGCIFPELLSRN;AWAYATNFVPG;GGPLGEITDPLYPGG;VNLSPEFSALLGNGRVSMRKT;MATSAASSSAASLAI
PbrLhcb1.4	10	motif1;motif2;motif3;motif4;motif5;motif7;motif8;motif10;motif11;motif12	FPGDYGFDPLGLSADPETFAKNRELEVIHSRWAM;ELKVKEJKNGRLAMFSMLGFFVQAIVTGK;EAVWFKAGAQIFSEGGLDYLGNPSLVHAQSILAIWATQVVLMGAVEGYRI;KVSSGSPWYGPDRVKYLGPFSGZTPSYLTGE;JENLADHLADPVHNN;FDPLGLAKDPE;LGALGCIFPELLSRN;AWAYATNFVPG;GGPLGEITDPLYPGG;VNLSPEFSALLGNGRVSMRKT
PbrLhcb1.5	11	motif1;motif2;motif3;motif4;motif5;motif7;motif8;motif10;motif11;motif12;motif15	FPGDYGFDPLGLSADPETFAKNRELEVIHSRWAM;ELKVKEJKNGRLAMFSMLGFFVQAIVTGK;EAVWFKAGAQIFSEGGLDYLGNPSLVHAQSILAIWATQVVLMGAVEGYRI;KVSSGSPWYGPDRVKYLGPFSGZTPSYLTGE;JENLADHLADPVHNN;FDPLGLAKDPE;LGALGCIFPELLSRN;AWAYATNFVPG;GGPLGEITDPLYPGG;VNLSPEFSALLGNGRVSMRKT;MATSAASSSAASLAI
PbrLhcb1.6	11	motif1;motif2;motif3;motif4;motif5;motif7;motif8;motif10;motif11;motif12;motif15	FPGDYGFDPLGLSADPETFAKNRELEVIHSRWAM;ELKVKEJKNGRLAMFSMLGFFVQAIVTGK;EAVWFKAGAQIFSEGGLDYLGNPSLVHAQSILAIWATQVVLMGAVEGYRI;KVSSGSPWYGPDRVKYLGPFSGZTPSYLTGE;JENLADHLADPVHNN;FDPLGLAKDPE;LGALGCIFPELLSRN;AWAYATNFVPG;GGPLGEITDPLYPGG;VNLSPEFSALLGNGRVSMRKT;MATSAASSSAASLAI
PbrLhcb1.7	11	motif1;motif2;motif3;motif4;motif5;motif7;motif8;motif10;motif11;motif12;motif15	FPGDYGFDPLGLSADPETFAKNRELEVIHSRWAM;ELKVKEJKNGRLAMFSMLGFFVQAIVTGK;EAVWFKAGAQIFSEGGLDYLGNPSLVHAQSILAIWATQVVLMGAVEGYRI;KVSSGSPWYGPDRVKYLGPFSGZTPSYLTGE;JENLADHLADPVHNN;FDPLGLAKDPE;LGALGCIFPELLSRN;AWAYATNFVPG;GGPLGEITDPLYPGG;VNLSPEFSALLGNGRVSMRKT;MATSAASSSAASLAI
PbrLhcb1.8	11	motif1;motif2;motif3;motif4;motif5;motif7;motif8;motif10;motif11;motif12;motif15	FPGDYGFDPLGLSADPETFAKNRELEVIHSRWAM;ELKVKEJKNGRLAMFSMLGFFVQAIVTGK;EAVWFKAGAQIFSEGGLDYLGNPSLVHAQSILAIWATQVVLMGAVEGYRI;KVSSGSPWYGPDRVKYLGPFSGZTPSYLTGE;JENLADHLADPVHNN;FDPLGLAKDPE;LGALGCIFPELLSRN;AWAYATNFVPG;GGPLGEITDPLYPGG;VNLSPEFSALLGNGRVSMRKT;MATSAASSSAASLAI
PbrLhcb2.1	11	motif1;motif2;motif3;motif4;motif5;motif7;motif8;motif10;motif11;motif12;motif15	FPGDYGFDPLGLSADPETFAKNRELEVIHSRWAM;ELKVKEJKNGRLAMFSMLGFFVQAIVTGK;EAVWFKAGAQIFSEGGLDYLGNPSLVHAQSILAIWATQVVLMGAVEGYRI;KVSSGSPWYGPDRVKYLGPFSGZTPSYLTGE;JENLADHLADPVHNN;FDPLGLAKDPE;LGALGCIFPELLSRN;AWAYATNFVPG;GGPLGEITDPLYPGG;VNLSPEFSALLGNGRVSMRKT;MATSAASSSAASLAI
PbrLhcb2.2	11	motif1;motif2;motif3;motif4;motif5;motif7;motif8;motif10;motif11;motif12;motif15	FPGDYGFDPLGLSADPETFAKNRELEVIHSRWAM;ELKVKEJKNGRLAMFSMLGFFVQAIVTGK;EAVWFKAGAQIFSEGGLDYLGNPSLVHAQSILAIWATQVVLMGAVEGYRI;KVSSGSPWYGPDRVKYLGPFSGZTPSYLTGE;JENLADHLADPVHNN;FDPLGLAKDPE;LGALGCIFPELLSRN;AWAYATNFVPG;GGPLGEITDPLYPGG;VNLSPEFSALLGNGRVSMRKT;MATSAASSSAASLAI
PbrLhcb3.1	9	motif1;motif2;motif3;motif4;motif5;motif7;motif8;motif10;motif15	FPGDYGFDPLGLSADPETFAKNRELEVIHSRWAM;ELKVKEJKNGRLAMFSMLGFFVQAIVTGK;EAVWFKAGAQIFSEGGLDYLGNPSLVHAQSILAIWATQVVLMGAVEGYRI;KVSSGSPWYGPDRVKYLGPFSGZTPSYLTGE;JENLADHLADPVHNN;FDPLGLAKDPE;LGALGCIFPELLSRN;AWAYATNFVPG;MATSAASSSAASLAI
PbrLhcb3.2	9	motif1;motif2;motif3;motif4;motif5;motif7;motif8;motif10;motif15	FPGDYGFDPLGLSADPETFAKNRELEVIHSRWAM;ELKVKEJKNGRLAMFSMLGFFVQAIVTGK;EAVWFKAGAQIFSEGGLDYLGNPSLVHAQSILAIWATQVVLMGAVEGYRI;KVSSGSPWYGPDRVKYLGPFSGZTPSYLTGE;JENLADHLADPVHNN;FDPLGLAKDPE;LGALGCIFPELLSRN;AWAYATNFVPG;MATSAASSSAASLAI
PbrLhcb4.1	9	motif1;motif2;motif5;motif6;motif7;motif8;motif9;motif14;motif15	FPGDYGFDPLGLSADPETFAKNRELEVIHSRWAM;ELKVKEJKNGRLAMFSMLGFFVQAIVTGK;JENLADHLADPVHNN;SJTTLLVIEFLLIGYVEFQRWADLDPPKS;FDPLGLAKDPE;LGALGCIFPELLSRN;YLQYDYDGLDQNLAKNLAGDIIGTRTETADVNPTPFQPYTE;WQDAGKVELIEGSSYLGQPLP;MATSAASSSAASLAI
PbrLhcb4.2	9	motif1;motif2;motif5;motif6;motif7;motif8;motif9;motif14;motif15	FPGDYGFDPLGLSADPETFAKNRELEVIHSRWAM;ELKVKEJKNGRLAMFSMLGFFVQAIVTGK;JENLADHLADPVHNN;SJTTLLVIEFLLIGYVEFQRWADLDPPKS;FDPLGLAKDPE;LGALGCIFPELLSRN;YLQYDYDGLDQNLAKNLAGDIIGTRTETADVNPTPFQPYTE;WQDAGKVELIEGSSYLGQPLP;MATSAASSSAASLAI
PbrLhcb5.1	7	motif1;motif2;motif6;motif7;motif9;motif13;motif14	FPGDYGFDPLGLSADPETFAKNRELEVIHSRWAM;ELKVKEJKNGRLAMFSMLGFFVQAIVTGK;SJTTLLVIEFLLIGYVEFQRWADLDPPKS;FDPLGLAKDPE;YLQYDYDGLDQNLAKNLAGDIIGTRTETADVNPTPFQPYTE;AMRGEWLPGLPSPPYLDGS;WQDAGKVELIEGSSYLGQPLP
PbrLhcb5.2	7	motif1;motif2;motif6;motif7;motif8;motif9;motif14	FPGDYGFDPLGLSADPETFAKNRELEVIHSRWAM;ELKVKEJKNGRLAMFSMLGFFVQAIVTGK;SJTTLLVIEFLLIGYVEFQRWADLDPPKS;FDPLGLAKDPE;LGALGCIFPELLSRN;YLQYDYDGLDQNLAKNLAGDIIGTRTETADVNPTPFQPYTE;WQDAGKVELIEGSSYLGQPLP
PbrLhcb6.1	7	motif1;motif2;motif5;motif7;motif8;motif11;motif15	FPGDYGFDPLGLSADPETFAKNRELEVIHSRWAM;ELKVKEJKNGRLAMFSMLGFFVQAIVTGK;JENLADHLADPVHNN;FDPLGLAKDPE;LGALGCIFPELLSRN;GGPLGEITDPLYPGG;MATSAASSSAASLAI
PbrLhcb6.2	7	motif1;motif2;motif5;motif7;motif8;motif11;motif15	FPGDYGFDPLGLSADPETFAKNRELEVIHSRWAM;ELKVKEJKNGRLAMFSMLGFFVQAIVTGK;JENLADHLADPVHNN;FDPLGLAKDPE;LGALGCIFPELLSRN;GGPLGEITDPLYPGG;MATSAASSSAASLAI
PbrLhcb7.1	6	motif1;motif2;motif6;motif7;motif8;motif13	FPGDYGFDPLGLSADPETFAKNRELEVIHSRWAM;ELKVKEJKNGRLAMFSMLGFFVQAIVTGK;SJTTLLVIEFLLIGYVEFQRWADLDPPKS;FDPLGLAKDPE;LGALGCIFPELLSRN;AMRGEWLPGLPSPPYLDGS
PbrLhcb7.2	6	motif1;motif2;motif6;motif7;motif8;motif13	FPGDYGFDPLGLSADPETFAKNRELEVIHSRWAM;ELKVKEJKNGRLAMFSMLGFFVQAIVTGK;SJTTLLVIEFLLIGYVEFQRWADLDPPKS;FDPLGLAKDPE;LGALGCIFPELLSRN;AMRGEWLPGLPSPPYLDGS
PbrLhcb8	6	motif1;motif2;motif4;motif5;motif7;motif8	FPGDYGFDPLGLSADPETFAKNRELEVIHSRWAM;ELKVKEJKNGRLAMFSMLGFFVQAIVTGK;KVSSGSPWYGPDRVKYLGPFSGZTPSYLTGE;JENLADHLADPVHNN;FDPLGLAKDPE;LGALGCIFPELLSRN
